# Supplementary material for: Diffusion Tensor-Derived Properties of Benign Oligemia, True “at Risk” Penumbra, and Infarct Core during the First Three Hours of Stroke Onset: A Rat Model
Source: PubMed Central journal article supplement — Korean J Radiol. 2018 Oct 18;19(6):1161–71. doi: 10.3348/kjr.2018.19.6.1161 (PMC6201972; doi:10.3348/kjr.2018.19.6.1161), 2018-10-18
Supplement: kjr-19-1161-s001.pdf [file kjr-19-1161-s001.pdf]

**Supplementary Table 1. Discrimination Performance Based on DTI Metrics at 30 Minutes Post pMCAO**

| 30 Min          | DTI Metrics | Accuracy (%) | Best Cut Off (%) | Sensitivity | Specificity | Area Under Curve |
|-----------------|-------------|--------------|------------------|-------------|-------------|------------------|
| NT vs. oligemia |             |              |                  |             |             |                  |
|                 | rFA         | 27.30        | 12.54            | 0.04        | 0.99        | 0.27             |
|                 | rq          | 51.40        | 1.42             | 0.44        | 0.70        | 0.51             |
|                 | rL          | 59.70        | 1.90             | 0.66        | 0.54        | 0.60             |
|                 | rMD         | 59.80        | 1.53             | 0.62        | 0.58        | 0.60             |
|                 | rAD         | 60.00        | 1.14             | 0.61        | 0.64        | 0.60             |
|                 | rRD         | 59.20        | 4.32             | 0.79        | 0.41        | 0.59             |
| Oligemia vs. TP |             |              |                  |             |             |                  |
|                 | rFA         | 33.80        | -6.64            | 0.95        | 0.10        | 0.34             |
|                 | rq          | 72.90        | -0.61            | 0.55        | 0.80        | 0.73             |
|                 | rL          | 89.00        | -2.81            | 0.75        | 0.90        | 0.89             |
|                 | rMD         | 89.30        | -5.03            | 0.86        | 0.80        | 0.89             |
|                 | rAD         | 88.00        | -4.13            | 0.85        | 0.81        | 0.88             |
|                 | rRD         | 88.30        | -6.44            | 0.88        | 0.74        | 0.88             |
| TP vs. IC       |             |              |                  |             |             |                  |
|                 | rFA         | 15.10        | 137.22           | 0.00        | 1.00        | 0.15             |
|                 | rq          | 95.20        | -14.40           | 0.88        | 0.92        | 0.95             |
|                 | rL          | 99.90        | -22.84           | 0.99        | 0.99        | 1.00             |
|                 | rMD         | 99.90        | -23.72           | 0.99        | 0.99        | 1.00             |
|                 | rAD         | 99.90        | -21.62           | 0.99        | 0.99        | 1.00             |
|                 | rRD         | 99.80        | -25.76           | 1.00        | 0.99        | 1.00             |

DTI = diffusion tensor imaging, IC = infarct core, NT = normal tissue, pMCAO = permanent middle cerebral artery occlusion, rAD = relative axial diffusivity, rFA = relative fractional anisotropy, rL = relative diffusion magnitude, rMD = relative mean diffusivity, rq = relative pure anisotropy, rRD = relative radial diffusivity, TP = true penumbra
