# Supplementary material for: Diffusion Tensor-Derived Properties of Benign Oligemia, True “at Risk” Penumbra, and Infarct Core during the First Three Hours of Stroke Onset: A Rat Model
Source: PubMed Central journal article supplement — Korean J Radiol. 2018 Oct 18;19(6):1161–71. doi: 10.3348/kjr.2018.19.6.1161 (PMC6201972; doi:10.3348/kjr.2018.19.6.1161), 2018-10-18
Supplement: kjr-19-1161-s002.pdf [file kjr-19-1161-s002.pdf]

**Supplementary Table 2. Discrimination Performance Based on DTI Metrics at 60 Minutes Post pMCAO**

| 60 Min          | DTI Metrics | Accuracy (%) | Best Cut Off (%) | Sensitivity | Specificity | Area Under Curve |
|-----------------|-------------|--------------|------------------|-------------|-------------|------------------|
| NT vs. oligemia |             |              |                  |             |             |                  |
|                 | rFA         | 36.30        | 14.13            | 0.12        | 0.98        | 0.36             |
|                 | rq          | 49.40        | 5.02             | 0.32        | 0.83        | 0.49             |
|                 | rL          | 59.20        | -2.17            | 0.56        | 0.68        | 0.59             |
|                 | rMD         | 59.10        | -1.68            | 0.46        | 0.74        | 0.59             |
|                 | rAD         | 58.00        | -0.95            | 0.48        | 0.74        | 0.58             |
|                 | rRD         | 58.60        | -2.05            | 0.44        | 0.73        | 0.59             |
| Oligemia vs. TP |             |              |                  |             |             |                  |
|                 | rFA         | 26.30        | 138.29           | 0.00        | 1.00        | 0.26             |
|                 | rq          | 86.10        | -9.46            | 0.88        | 0.73        | 0.86             |
|                 | rL          | 98.20        | -12.12           | 0.98        | 0.93        | 0.98             |
|                 | rMD         | 98.20        | -12.93           | 0.98        | 0.93        | 0.98             |
|                 | rAD         | 97.70        | -12.03           | 0.99        | 0.89        | 0.98             |
|                 | rRD         | 97.60        | -10.08           | 0.93        | 0.98        | 0.98             |
| TP vs. IC       |             |              |                  |             |             |                  |
|                 | rFA         | 41.00        | 143.14           | 0.00        | 1.00        | 0.41             |
|                 | rq          | 89.90        | -26.49           | 0.96        | 0.75        | 0.90             |
|                 | rL          | 96.30        | -31.97           | 0.92        | 0.93        | 0.96             |
|                 | rMD         | 96.60        | -33.31           | 0.93        | 0.94        | 0.97             |
|                 | rAD         | 95.90        | -29.43           | 0.91        | 0.92        | 0.96             |
|                 | rRD         | 96.60        | -34.35           | 0.91        | 0.95        | 0.97             |
