# Supplementary material for: Diffusion Tensor-Derived Properties of Benign Oligemia, True “at Risk” Penumbra, and Infarct Core during the First Three Hours of Stroke Onset: A Rat Model
Source: PubMed Central journal article supplement — Korean J Radiol. 2018 Oct 18;19(6):1161–71. doi: 10.3348/kjr.2018.19.6.1161 (PMC6201972; doi:10.3348/kjr.2018.19.6.1161), 2018-10-18
Supplement: kjr-19-1161-s003.pdf [file kjr-19-1161-s003.pdf]

**Supplementary Table 3. Discrimination Performance Based on DTI Metrics at 90 Minutes Post pMCAO**

| 90 Min          | DTI Metrics | Accuracy (%) | Best Cut Off (%) | Sensitivity | Specificity | Area Under Curve |
|-----------------|-------------|--------------|------------------|-------------|-------------|------------------|
| NT vs. oligemia |             |              |                  |             |             |                  |
|                 | rFA         | 33.40        | 18.03            | 0.08        | 0.96        | 0.33             |
|                 | rq          | 49.40        | 0.74             | 0.39        | 0.74        | 0.49             |
|                 | rL          | 62.80        | -3.10            | 0.58        | 0.70        | 0.63             |
|                 | rMD         | 63.50        | -2.99            | 0.55        | 0.75        | 0.64             |
|                 | rAD         | 62.00        | -4.31            | 0.70        | 0.58        | 0.62             |
|                 | rRD         | 62.60        | -2.35            | 0.45        | 0.81        | 0.63             |
| Oligemia vs. TP |             |              |                  |             |             |                  |
|                 | rFA         | 21.30        | 112.43           | 0.00        | 1.00        | 0.21             |
|                 | rq          | 89.60        | -10.39           | 0.83        | 0.85        | 0.90             |
|                 | rL          | 98.50        | -16.92           | 0.99        | 0.89        | 0.99             |
|                 | rMD         | 98.60        | -14.08           | 0.95        | 0.93        | 0.99             |
|                 | rAD         | 97.80        | -14.47           | 0.96        | 0.91        | 0.98             |
|                 | rRD         | 98.70        | -16.57           | 0.95        | 0.93        | 0.99             |
| TP vs. IC       |             |              |                  |             |             |                  |
|                 | rFA         | 58.30        | 6.79             | 0.71        | 0.48        | 0.58             |
|                 | rq          | 92.60        | -33.90           | 0.94        | 0.77        | 0.93             |
|                 | rL          | 88.80        | -37.28           | 0.81        | 0.92        | 0.89             |
|                 | rMD         | 88.10        | -37.06           | 0.79        | 0.93        | 0.88             |
|                 | rAD         | 90.60        | -35.08           | 0.80        | 0.93        | 0.91             |
|                 | rRD         | 85.90        | -39.32           | 0.80        | 0.89        | 0.86             |
