# Supplementary material for: Diffusion Tensor-Derived Properties of Benign Oligemia, True “at Risk” Penumbra, and Infarct Core during the First Three Hours of Stroke Onset: A Rat Model
Source: PubMed Central journal article supplement — Korean J Radiol. 2018 Oct 18;19(6):1161–71. doi: 10.3348/kjr.2018.19.6.1161 (PMC6201972; doi:10.3348/kjr.2018.19.6.1161), 2018-10-18
Supplement: kjr-19-1161-s004.pdf [file kjr-19-1161-s004.pdf]

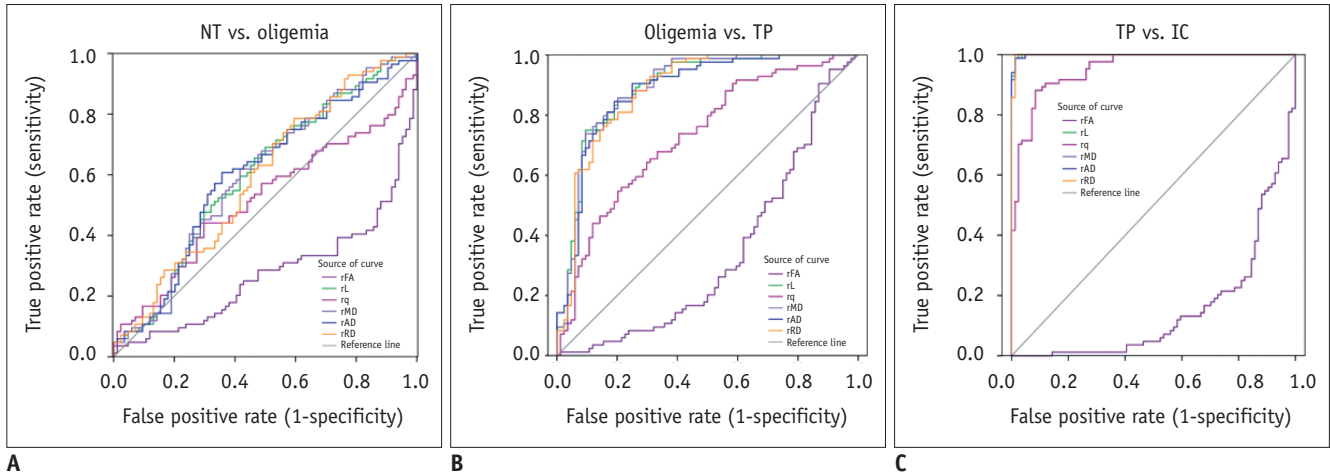

**A** **Supplementary Fig. 1. 30 minutes ROC curve.**

ROC curves in discriminating NT from oligemia **(A)**, oligemia from TP **(B)**, and TP from IC **(C)**, using diffusion metrics at 30 minutes post pMCAO. IC = infarct core, NT = normal tissue, pMCAO = permanent middle cerebral artery occlusion, rAD = relative axial diffusivity, rFA = relative fractional anisotropy, rL = relative diffusion magnitude, rMD = relative mean diffusivity, ROC = receiver operating characteristic, rq = relative pure anisotropy, rRD = relative radial diffusivity, TP = true penumbra
