# Supplementary material for: Diffusion Tensor-Derived Properties of Benign Oligemia, True “at Risk” Penumbra, and Infarct Core during the First Three Hours of Stroke Onset: A Rat Model
Source: PubMed Central journal article supplement — Korean J Radiol. 2018 Oct 18;19(6):1161–71. doi: 10.3348/kjr.2018.19.6.1161 (PMC6201972; doi:10.3348/kjr.2018.19.6.1161), 2018-10-18
Supplement: kjr-19-1161-s005.pdf [file kjr-19-1161-s005.pdf]

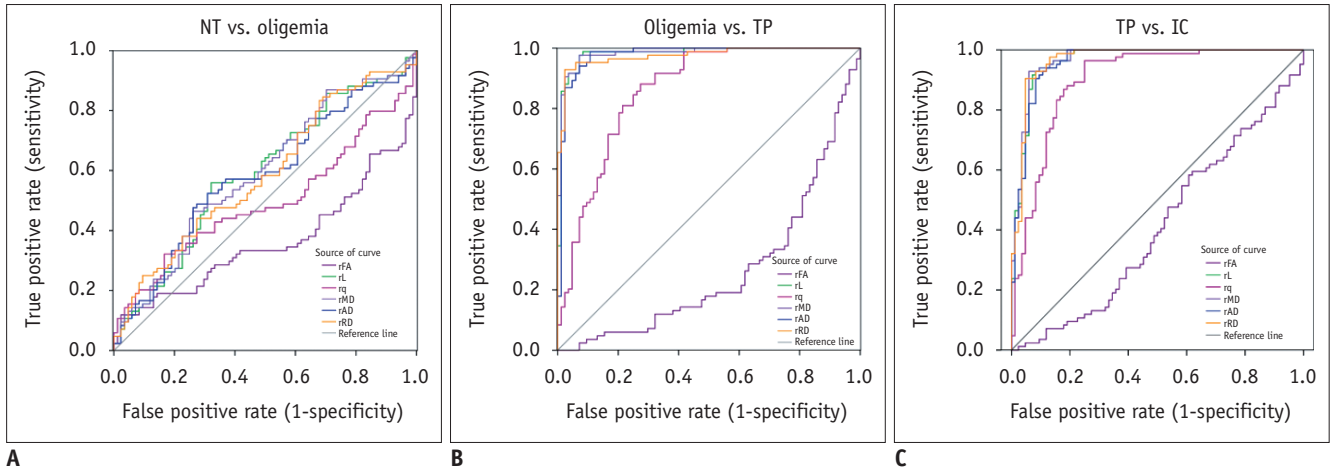

**Supplementary Fig. 2. 60 minutes ROC curve.**

ROC curves in discriminating NT from oligemia (A), oligemia from TP (B), and TP from IC (C), using diffusion metrics at 60 minutes post pMCAO.
