# Supplementary material for: Diffusion Tensor-Derived Properties of Benign Oligemia, True “at Risk” Penumbra, and Infarct Core during the First Three Hours of Stroke Onset: A Rat Model
Source: PubMed Central journal article supplement — Korean J Radiol. 2018 Oct 18;19(6):1161–71. doi: 10.3348/kjr.2018.19.6.1161 (PMC6201972; doi:10.3348/kjr.2018.19.6.1161), 2018-10-18
Supplement: kjr-19-1161-s006.pdf [file kjr-19-1161-s006.pdf]

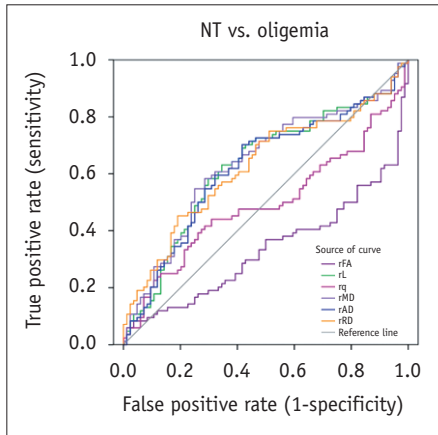

**A**

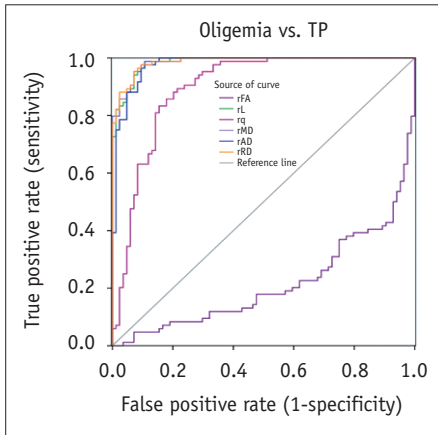

**B**

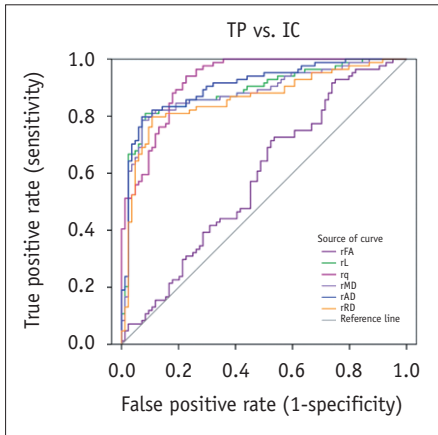

**C**

**Supplementary Fig. 3. 90 minutes ROC curve.**

ROC curves in discriminating NT from oligemia (**A**), oligemia from TP (**B**), and TP from IC (**C**), using diffusion metrics at 90 minutes post pMCAO.
